# Supplementary material for: Characterizing the uptake, accumulation and toxicity of silver sulfide nanoparticles in plants
Source: Royal Society of Chemistry journal article supplement (doi:10.1039/c6en00489j), 2016-12-17
Supplement: c6en00489j1.pdf [file c6en00489j1.pdf]

**Electronic Supplementary Information for**

**Characterizing the Uptake, Accumulation and Toxicity of Silver Sulfide**

**Nanoparticles in Plants†**

Peng Wang,<sup>\*ab</sup> Enzo Lombi,<sup>\*c</sup> Shengkai Sun,<sup>a</sup> Kirk G. Scheckel,<sup>d</sup> Anzhela Malysheva,<sup>ce</sup>

Brigid A. McKenna,<sup>b</sup> Neal W. Menzies,<sup>b</sup> Fang-Jie Zhao,<sup>a</sup> and Peter M. Kopittke<sup>b</sup>

<sup>a</sup> *Nanjing Agricultural University, College of Resources and Environmental Sciences,*

*Nanjing, Jiangsu, 210095, China*

<sup>b</sup> *The University of Queensland, School of Agriculture and Food Sciences, St. Lucia,*

*Queensland, 4072, Australia*

<sup>c</sup> *University of South Australia, Future Industries Institute, Mawson Lakes, South Australia,*

*5095, Australia*

<sup>d</sup> *United States Environmental Protection Agency, Office of Research and Development,*

*Cincinnati, Ohio, 45268, USA*

<sup>e</sup> *University of Copenhagen, Department of Plant and Environmental Sciences, Copenhagen,*

*1165, Denmark*

**Summary**

13 pages, including 2 tables and 9 figures.

**Table S1.** Primer sets used in the present study.

| Gene                                               | Name        | Primers                                                            |
|----------------------------------------------------|-------------|--------------------------------------------------------------------|
| Cucumber aquaporins                                | CsaActin    | 5'-GCTGGATTCTGGTGTGATGGTGTGAG-3' and 5'-TTCGGCAGTGGTGGTGAACATG-3'  |
|                                                    | CsaPIP1;1   | 5'-TCCGCCACCGATGCTAAGAGAA-3' and 5'-AAGCGTGTTCGCTGTTGTAGATGAT-3'   |
|                                                    | CsaPIP1;2   | 5'-ACCGTCTTCTCCGCCACTGAT-3' and 5'-ATCCCACGCTTTGTCCTTGTTGAA-3'     |
|                                                    | CsaPIP2.1   | 5'-TTGCGGCTGTGGCTTGGTTAAG-3' and 5'-TCTCTGGCGTTTCTCTTGGGATCA-3'    |
|                                                    | CsaPIP2.2   | 5'-TACTGTCTTCTCCGCCACTGATCC-3' and 5'-TGATTGTTGATGATGACGGCAGGAC-3' |
|                                                    | CsaPIP2.3   | 5'-TGTGGCTGTGCATTGGTGAAGG-3' and 5'-TCTCTTGGGATCGGTAGCGGAAA-3'     |
|                                                    | CsaPIP2.5   | 5'-TCTTCTCCGCCACCGATTCCAA-3' and 5'-GCCCAACCCAGAATATCCAATGGT-3'    |
|                                                    | CsaPIP2.6   | 5'-GGCTCTTGGTGTGAGATTATTGGA-3' and 5'-CCTGTGATGGGAATGGTTGCTAGAT-3' |
| Wheat aquaporins                                   | TaActin     | 5'-TCCTGGAATTGCTGATCGCATGAG-3' and 5'-AGACTCATCGTACTCCGCCTTGG-3'   |
|                                                    | TaPIP1      | 5'-CGCCGTCATCTACAACAAGGACAA-3' and 5'-GCCATTGCTTCAGTCTTGCATACAG-3' |
|                                                    | TaPIP2      | 5'-AAGAAGGCCGCCTCCAGCAA-3' and 5'-GGAAGAAACAGCAGCAAGCAAACAT-3'     |
|                                                    | TaPIP3      | 5'-GCGGCGGTAGTAGATGTTGTTCTT-3' and 5'-GCTGGCTGCTACTTGTCTGCTATT-3'  |
|                                                    | TaAQP1      | 5'-GACCAAGTCCTAAGCCGCTCCT-3' and 5'-GTCTGGGTCCAGGTTCCAGGTGTAT-3'   |
|                                                    | TaAQP2      | 5'-CTGCTGTGGTCTACAACAACGAGAA-3' and 5'-CCGTGCTTCCGATCATCCATACTG-3' |
|                                                    | TaAQP3      | 5'-GAGCTGCTGTGATCTACAACAACGA-3' and 5'-CGATCTAGCGACTGCCGAAGGA-3'   |
|                                                    | TaAQP4      | 5'-GGCTTCGCCGTCTTCATGGT-3' and 5'-CCCGGAGGATGTAAGTGGTGGTA-3'       |
| Cucumber ethylene signalling pathway related genes | Csa6M318160 | 5'-AGAGCATAACGATGAAGCTGCCAAG-3' and 5'-ACTCCTCGCTGTCACACGAACTA-3'  |
|                                                    | Csa4M001970 | 5'-GGCTCTGGGTCGGAGGATTCTTAT-3' and 5'-CACCTGTTCTTCTGCTGGATTCGT-3'  |
|                                                    | Csa3M164580 | 5'-TGGCACCTACAACACTCCTGAAGA-3' and 5'-GGCGGTGAGGGTGGTAGAGATAA-3'   |
|                                                    | Csa3M878200 | 5'-TGCTCGATCACGGATTCAGGAATTG-3' and 5'-GCTGGATGTTGAGACCCACAAGAG-3' |
|                                                    | Csa7M405830 | 5'-AGGAACGACAGCCGTGTTTCATTG-3' and                                 |

|                                                       |                                |                                                                                                                                             |
|-------------------------------------------------------|--------------------------------|---------------------------------------------------------------------------------------------------------------------------------------------|
|                                                       | Csa2M070880                    | 5'-CGGGA ACTGGAGAAGGAACTTGAC-3'<br>5'-GCACTCCTGGTGTTGATGGTTATGA-3' and<br>5'-CCGACGCTCTATAAGTTCCGACAA-3'                                    |
| Cucumber<br>miraculin-<br>like protein<br>(MLP) genes | Csa1M043200<br><br>Csa2M021500 | 5'-GCGAGTACGATCTGCGTGACATC-3' and<br>5'-AAGCCAAAGCCCTTTCTCCATTCTT-3'<br>5'-TGCAACTGAGTCTGATACCGGAAGA-3' and<br>5'-AAGCCACCAGCCTCACTCCATT-3' |

**Table S2.** The percentage speciation of Ag in various tissues of cucumber and wheat plants as calculated using linear combination fitting (LCF) of the K-edge XANES spectra.

| Treatment             | Metallic Ag | Ag <sub>2</sub> S | Ag-glutathione | R-factor |
|-----------------------|-------------|-------------------|----------------|----------|
| <b>Cucumber root</b>  |             |                   |                |          |
| AgNO <sub>3</sub>     | 10 (1.2)    |                   | 90 (1.2)       | 0.00015  |
| Ag <sub>2</sub> S-NPs |             | 94 (0.9)          | 6 (0.9)        | 0.00008  |
| <b>Cucumber leaf</b>  |             |                   |                |          |
| AgNO <sub>3</sub>     | 6 (1.8)     |                   | 94 (1.8)       | 0.00029  |
| Ag <sub>2</sub> S-NPs |             | 93 (1.1)          | 7 (0.7)        | 0.00014  |
| <b>Wheat root</b>     |             |                   |                |          |
| AgNO <sub>3</sub>     | 12 (0.8)    |                   | 88 (0.8)       | 0.00006  |
| Ag <sub>2</sub> S-NPs |             | 99 (0.3)          | 1 (0.3)        | 0.00006  |
| <b>Wheat shoot</b>    |             |                   |                |          |
| AgNO <sub>3</sub>     | 2 (2)       |                   | 98 (2)         | 0.00006  |
| Ag <sub>2</sub> S-NPs |             | 91 (1.4)          | 9 (1.4)        | 0.00041  |

The values in brackets show the percentage variation in the calculated values. The goodness of fit is indicated by the R-factor.  $R \text{ factor} = \frac{\sum i(\text{experimental} - \text{fit})^2}{\sum i(\text{experimental})^2}$ , where the sums are over the data points in the fitting region.

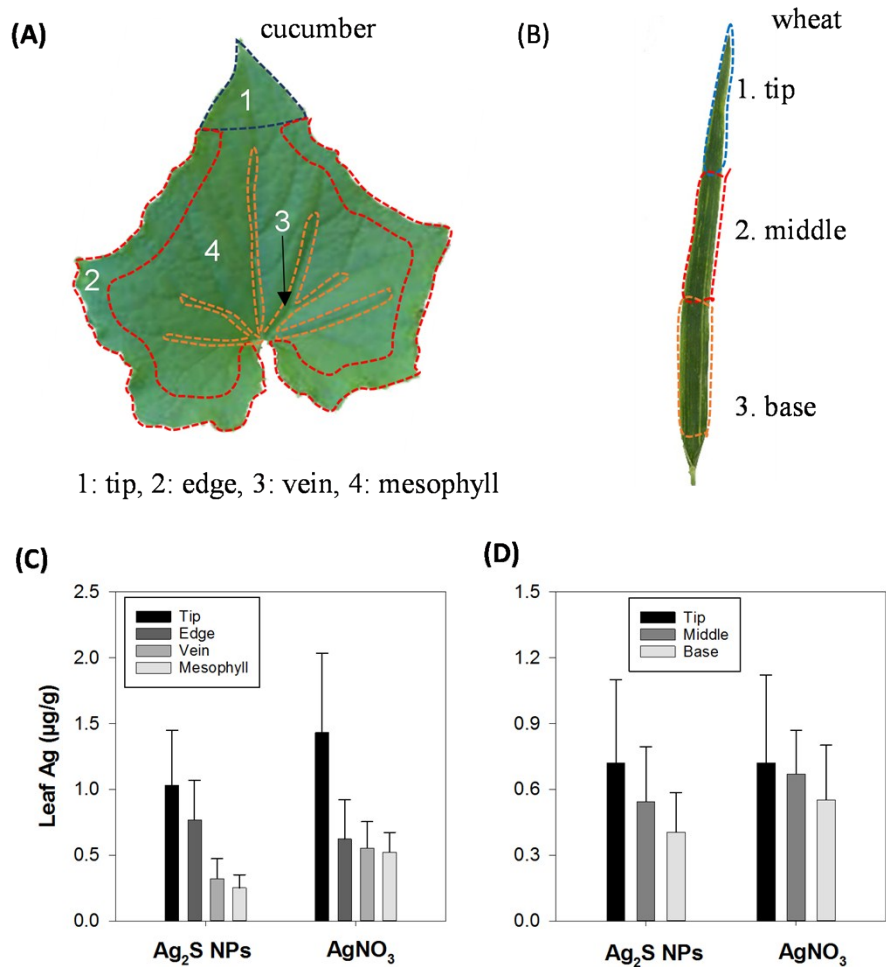

**Figure S1.** Approximate division of leaves and concentrations of Ag in various fractions of leaves of cucumber (A, C) and wheat (B,D). Cucumber leaves were divided into four fractions: tip, edge, vein, and interveinal mesophyll tissues, while wheat leaves were evenly divided into three fractions: tip, middle, and base.

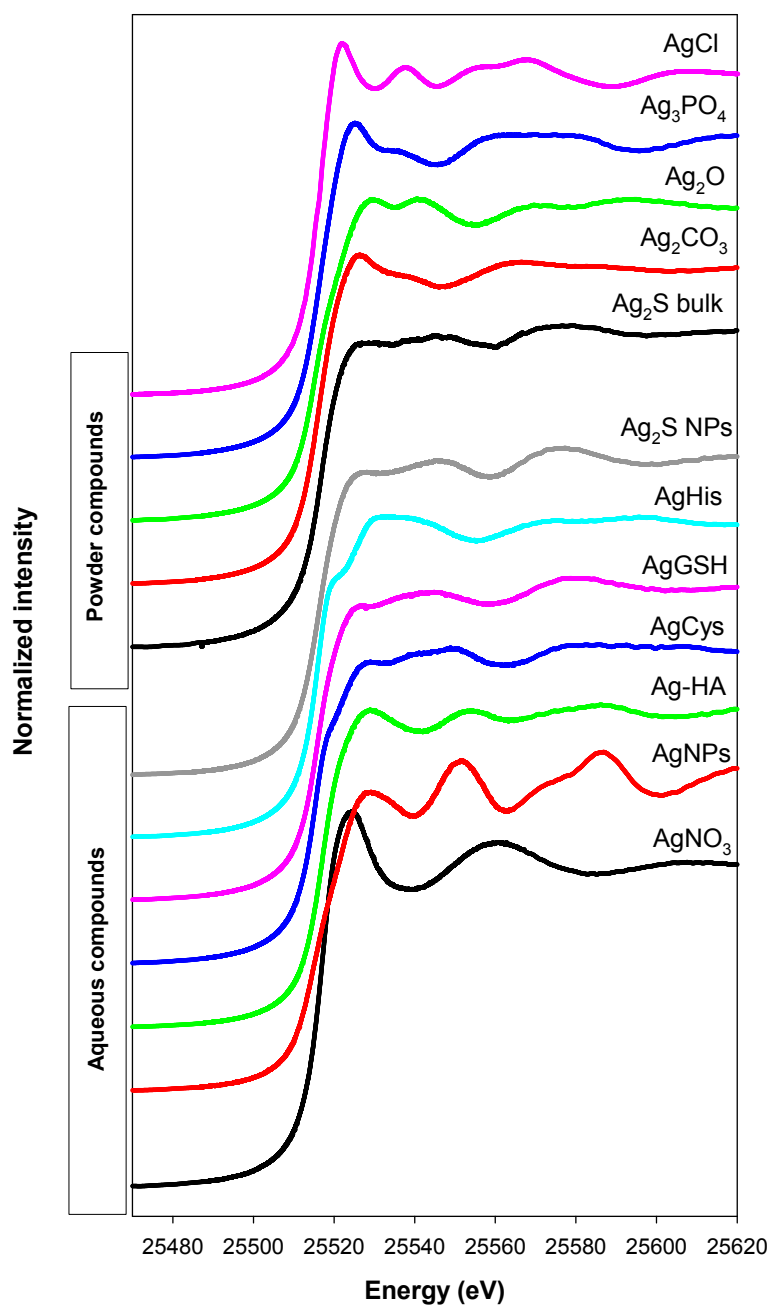

**Figure S2.** Ag K-edge XANES spectra of various Ag standard compounds.

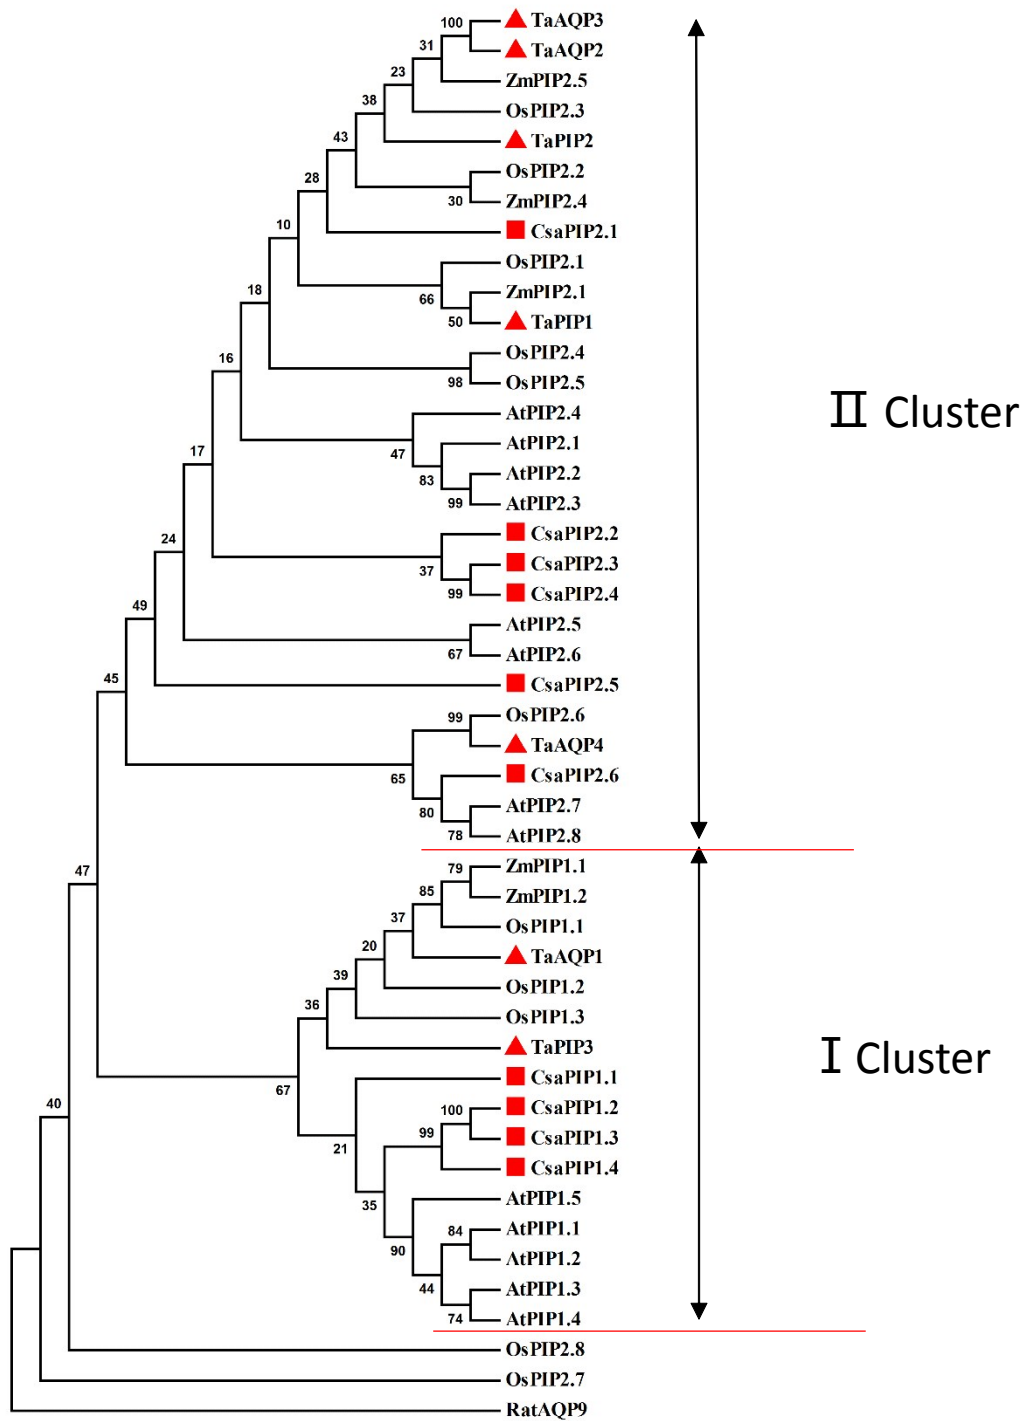

**Figure S3.** Classification of PIP gene family in cucumber and wheat based on the homology of protein sequences.

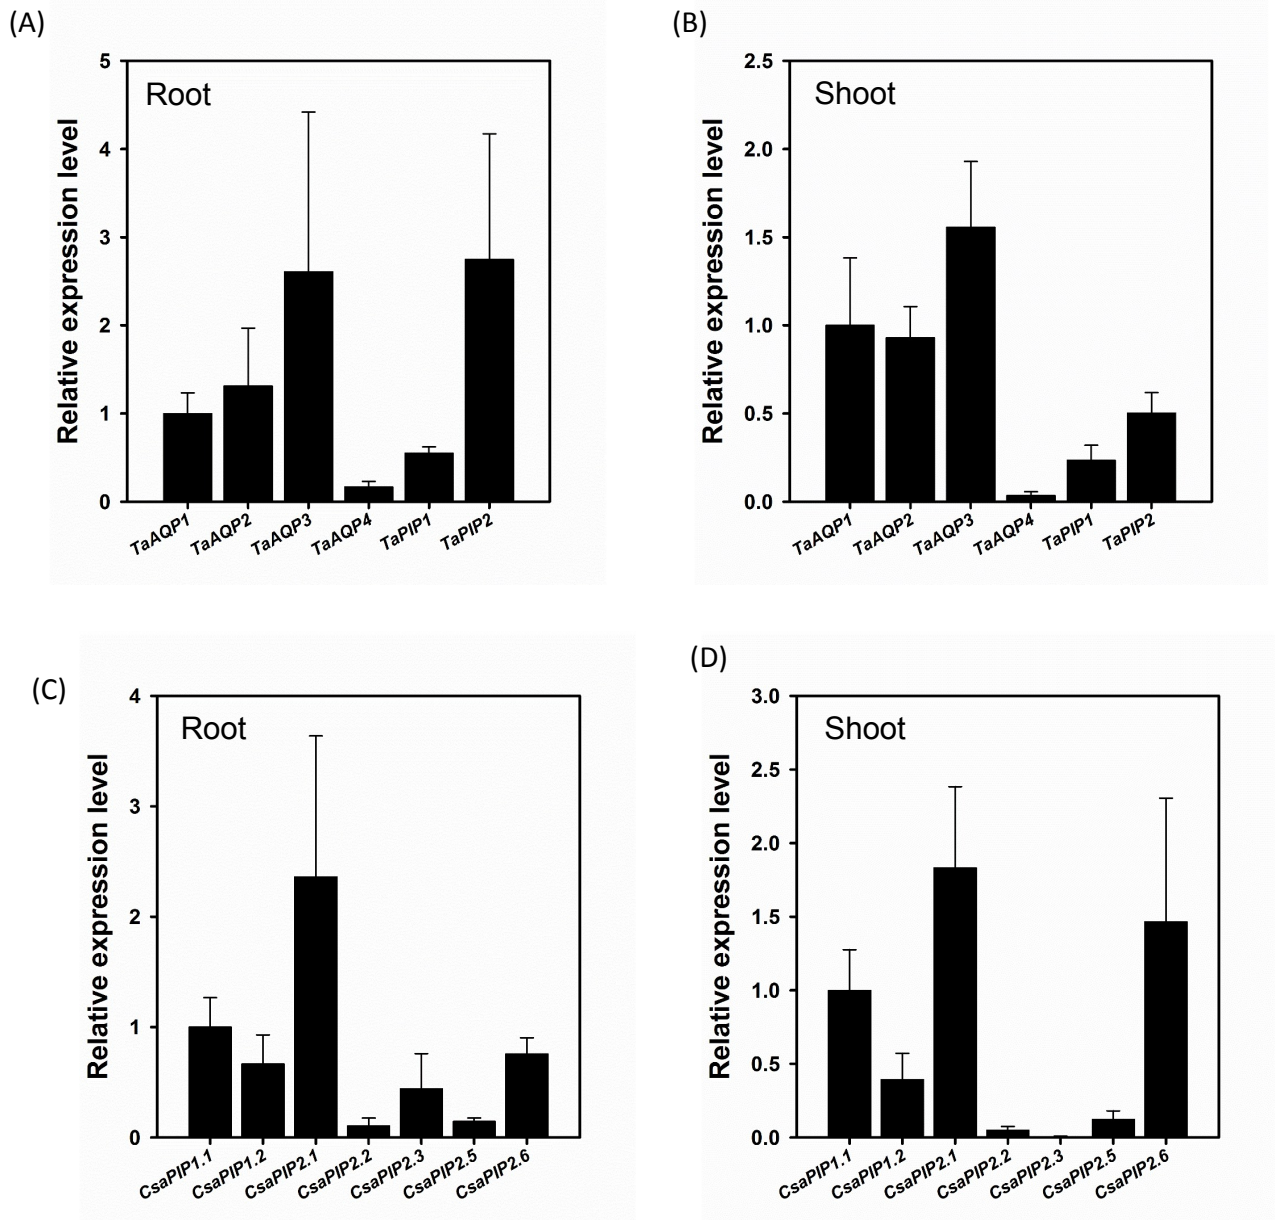

**Figure S4.** Relative expression of various aquaporin genes in roots (A, C) and shoots (B, D) cucumber (A, B) and wheat (C, D). Data are means  $\pm$  SD.



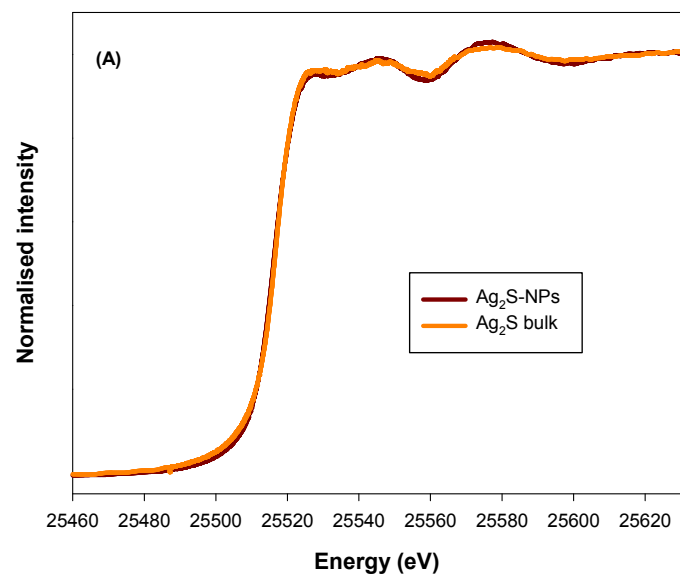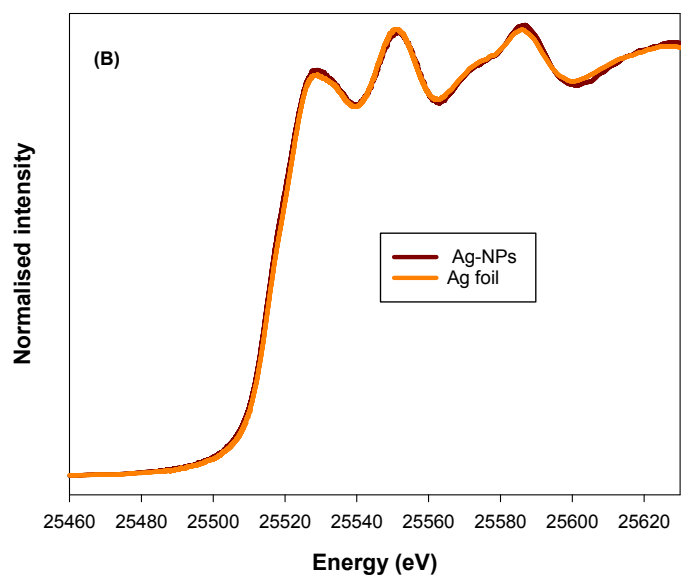

**Figure S5.** Comparison of XANES spectra of Ag<sub>2</sub>S-NPs (A) and Ag-NPs (B) with those of bulk Ag<sub>2</sub>S and Ag foil.

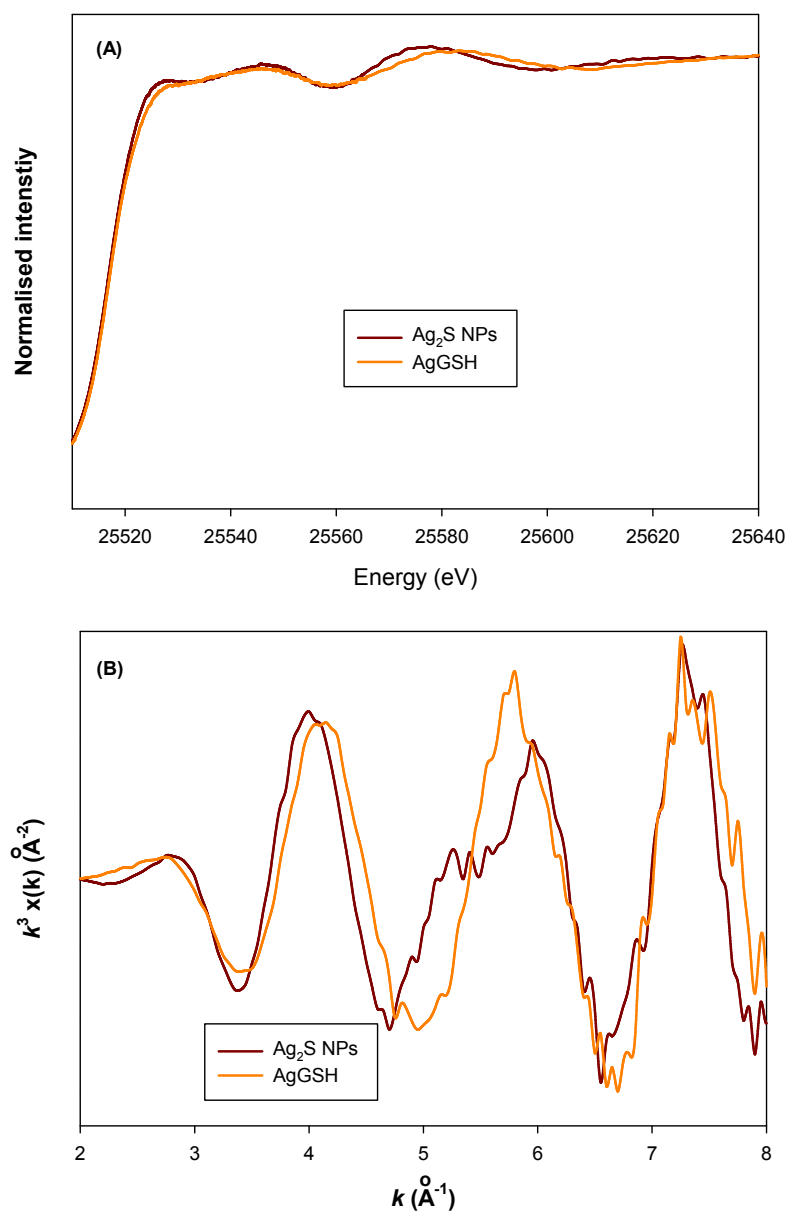

**Figure S6.** Ag K-edge XANES spectra (A) and  $k^3$ -weighted EXAFS spectra (B) of reference  $\text{Ag}_2\text{S}$ -NPs and Ag-glutathione (AgGSH).

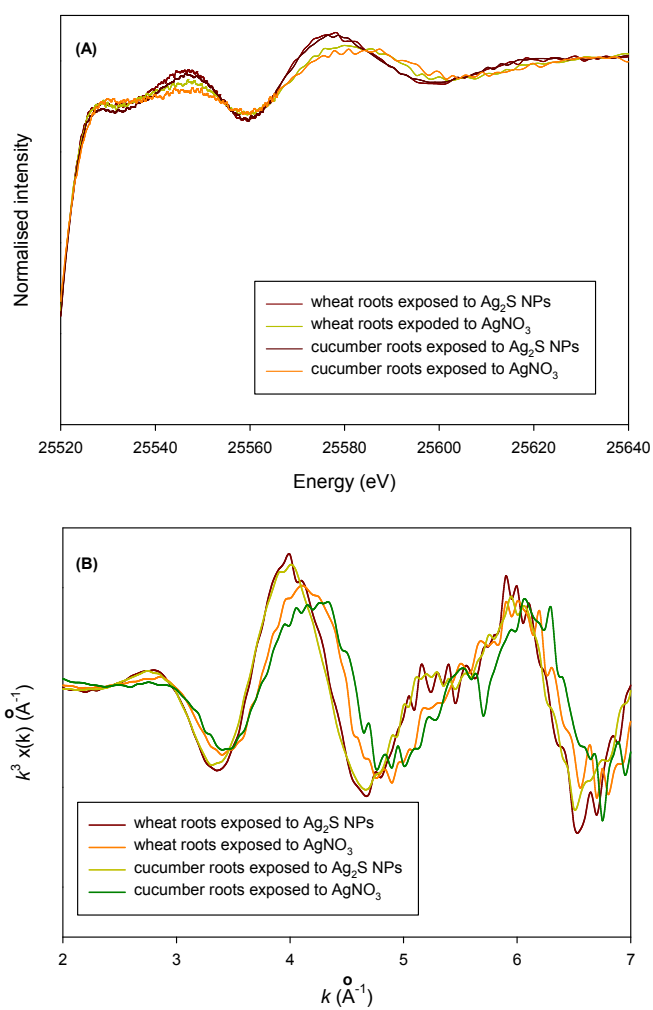

**Figure S7.** Comparison of the XANES spectra of  $\text{Ag}_2\text{S}$ -NP treated plants and those of  $\text{AgNO}_3$ -treated plants.

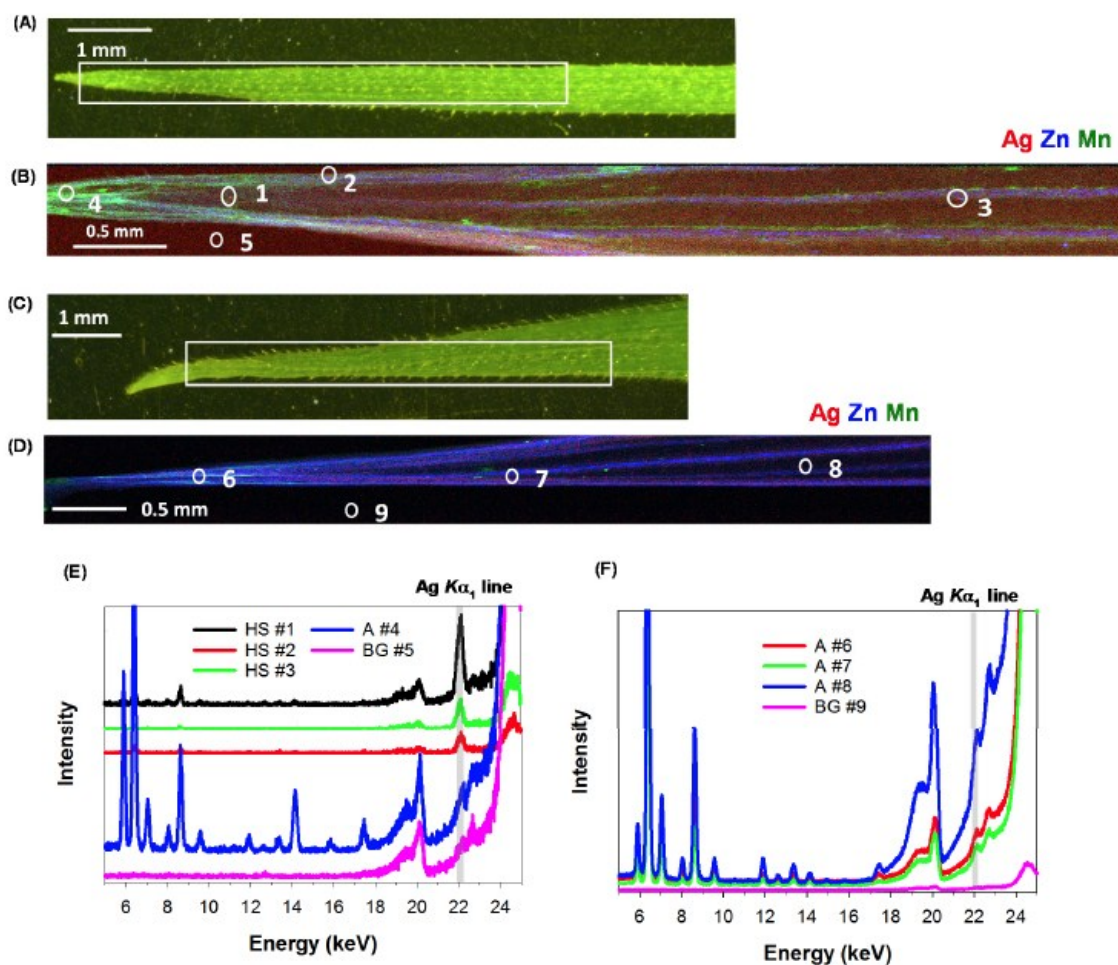

**Figure S8.** Leaves of wheat grown in nutrient solution containing  $10 \text{ mg Ag L}^{-1}$  as  $\text{Ag}_2\text{S-NPs}$  or  $0.5 \text{ mg Ag L}^{-1}$  as  $\text{AgNO}_3$  for one week. (A, C) Light micrograph after  $\mu\text{-XRF}$  analysis, with the white box indicating the area examined by  $\mu\text{-XRF}$ . (B, D) Tricolor  $\mu\text{-XRF}$  map of Ag (red), Zn (blue), Mn (green) distribution (top panel) of leaves of wheat exposed to  $\text{Ag}_2\text{S-NPs}$  (B) or  $\text{AgNO}_3$  (D). (E, F) Fluorescent intensity of  $\mu\text{-XRF}$  spectra collected at 27 keV for hotspots (HS #1-3), and selected areas (A #4, #6-8) background (BG #5, #9) as shown in (B) and (D).

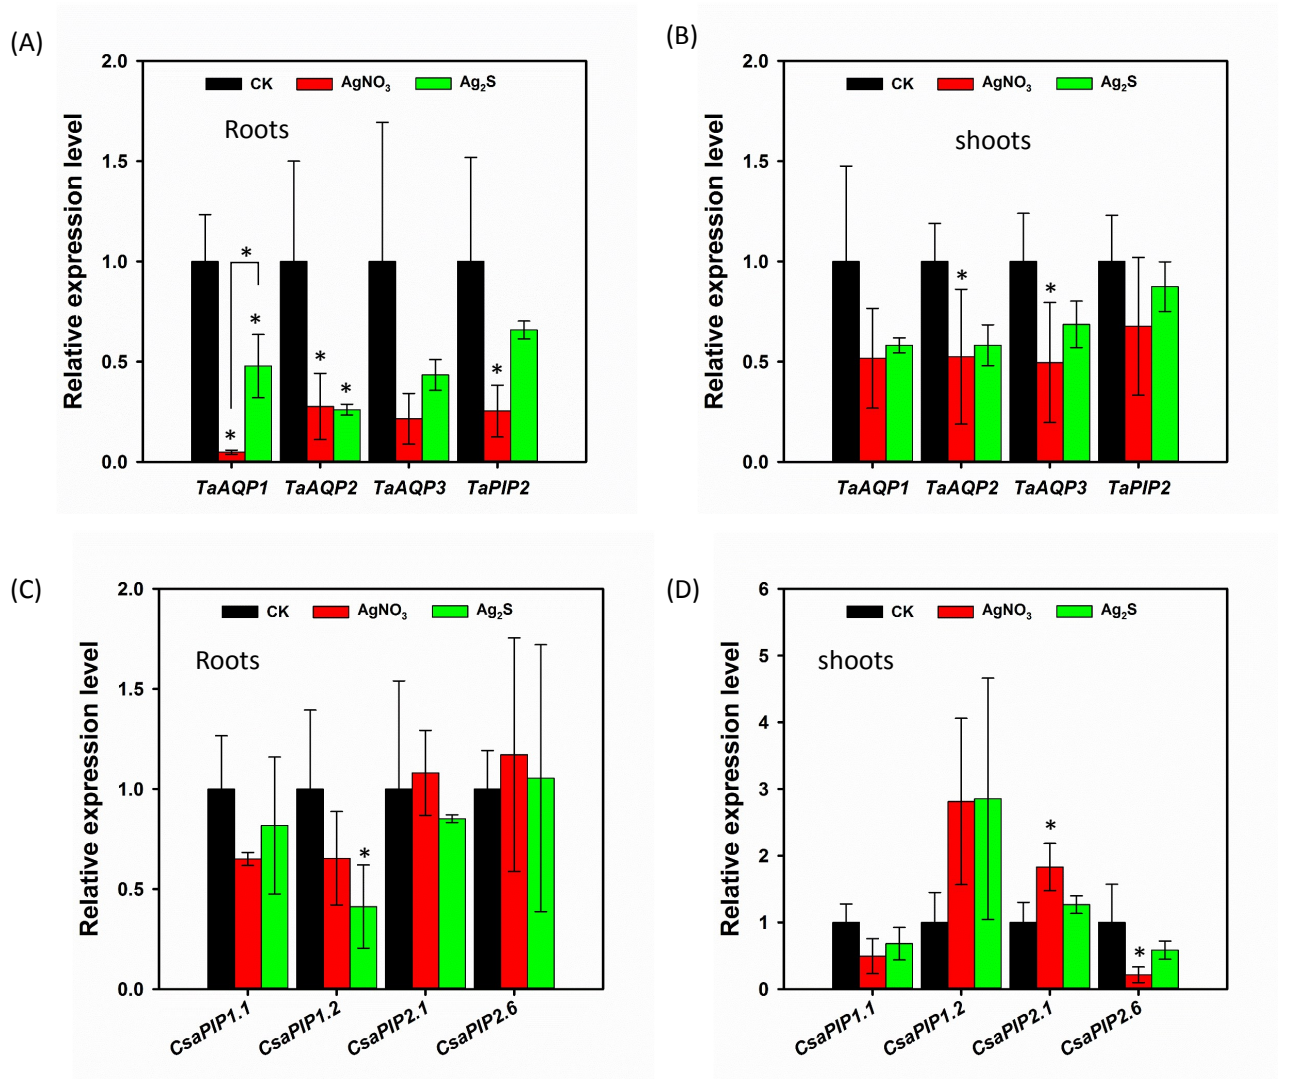

**Figure S9.** Relative expression of aquaporin genes in roots (A, C) and shoots (B, D) of cucumber (A, B) and wheat (C, D) exposed to Ag<sub>2</sub>S-NPs or AgNO<sub>3</sub> for one week. Data are means ± SD. \* indicates significant difference compared to the control.
